# Supplementary material for: Hierarchical silicon nanowires-carbon textiles matrix as a binder-free anode for high-performance advanced lithium-ion batteries
Source: PubMed Central journal article supplement — Sci Rep. 2013 Apr 9;3:1622. doi: 10.1038/srep01622 (PMC3621141; doi:10.1038/srep01622), 2013-04-09
Supplement: srep01622-s1.pdf [file srep01622-s1.pdf]

## Supplementary Information for

### **Hierarchical silicon nanowires-carbon textiles matrix as a binder-free anode for high-performance advanced lithium-ion batteries**

Bin Liu<sup>1</sup>, Xianfu Wang<sup>1</sup>, Haitian Chen<sup>3</sup>, Zhuoran Wang<sup>1</sup>, Di Chen<sup>1</sup>, Yi-Bing Cheng<sup>2</sup>, Chongwu Zhou<sup>3\*</sup>  
& Guozhen Shen<sup>1,4\*</sup>

<sup>1</sup> Wuhan National Laboratory for Optoelectronics (WNLO) and College of Optical and Electronic Information, Huazhong University of Science and Technology (HUST), Wuhan 430074, P. R. China.

<sup>2</sup> Faculty of Engineering, Monash University, VIC 3800, Australia.

<sup>3</sup> Department of Electric Engineering, University of Southern California, Los Angeles, California 90089, United States.

<sup>4</sup> State Key Laboratory for Superlattices and Microstructures, Institute of Semiconductors, Chinese Academy of Sciences, Beijing 100083, P. R. China.

Correspondence and requests for materials should be addressed to G.Z.S. ([gzshen@semi.ac.cn](mailto:gzshen@semi.ac.cn)) & C.W.Z. ([chongwuz@usc.edu](mailto:chongwuz@usc.edu))

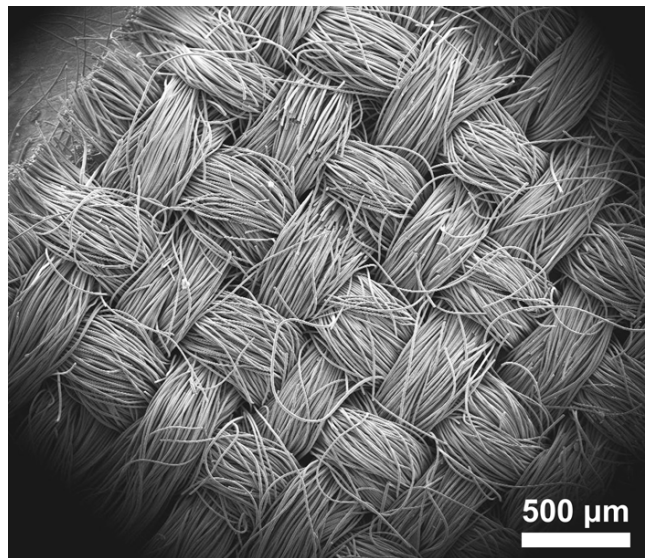

**Figure S1.** Typical SEM image of carbon textiles

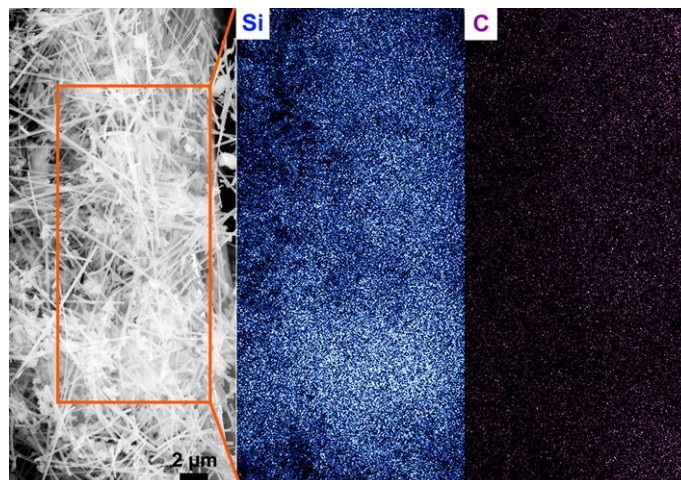

**Figure S2.** The mapping of silicon and carbon elements from selected SEM image.

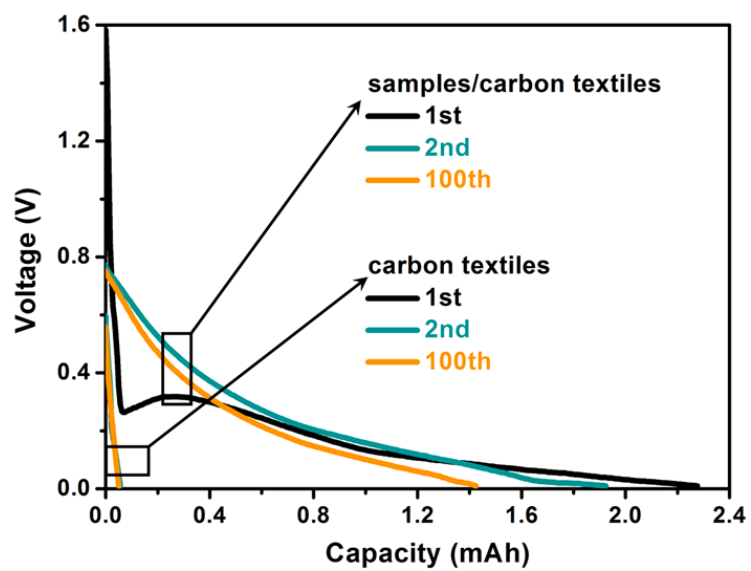

**Figure S3.** Galvanostatic discharge curves of samples/carbon textiles and carbon textiles.
